# Supplementary material
Source: publisher figshare collection journal article supplement (https://acs.figshare.com/ndownloader/files/3636045)
Supplement: Supplementary file 1 [file 3636045]

# Supporting information

## Investigation of Binary Mixtures Containing 1-Ethyl-3-methylimidazolium Bis(trifluoromethanesulfonyl)azanide and Ethylene Carbonate

*Andreas Hofmann, Matthias Migeot, Thomas Hanemann*

**Table SI-1.** DSC data of additional EMIM-TFSA/EC mixtures (melting temperature ( $T_m$ ), crystallizing temperature ( $T_K$ ), glass transition temperature ( $T_g$ )) measured in closed Al crucibles (Standard uncertainties  $u$  are  $u(\chi) = 0.0002$ ;  $u(T) = 3$  °C). The experimental pressure during the measurement inside the closed Al crucibles was not determined but estimated to be  $p = 0.1$  MPa ( $u(p) = 10$  kPa) at  $T \ll T_b$  ( $T_b$  = boiling point).

| EMIM-TFSA :<br>EC (wt./wt.) | $\chi$<br>EC | solid-liquid<br>transition / °C<br>DSC, 10 Kmin <sup>-1</sup> | $T_m$ / °C<br>(DSC)<br>(peak max) <sup>[a]</sup> | $T_g$ / °C<br>(DSC)<br>(point of<br>inflection) <sup>[c]</sup> |
|-----------------------------|--------------|---------------------------------------------------------------|--------------------------------------------------|----------------------------------------------------------------|
| 97.5:2.6                    | 0.10594      | -27.3                                                         | -14.6                                            | -89.5                                                          |
| 96.3:3.7                    | 0.14583      | -26.9                                                         | -16.2                                            | -89.9                                                          |
| 94.8:5.2                    | 0.19598      | -25.8                                                         | -18.8                                            | -90.2                                                          |
| 92.9:7.4                    | 0.26143      | -24.8                                                         | -21.8                                            | -90.7                                                          |
| 91.4:9.3                    | 0.31136      | -24.6                                                         | --                                               | -91.1                                                          |
| 89.3:10.3                   | 0.33886      | -25.6                                                         | --                                               | -91.3                                                          |
| 86.2:12.8                   | 0.39754      | -26.8                                                         | --                                               | -91.5                                                          |
| 84.5:15.2                   | 0.44424      | -25                                                           | --                                               | -92.2                                                          |
| 81.6:18.8                   | 0.50588      | -26.1                                                         | --                                               | -92.9                                                          |
| 78.6:22.5                   | 0.55987      | -26.2                                                         | -9.2                                             | -94.0                                                          |

[a] DSC: heating/cooling at 10 K min<sup>-1</sup>; the peak maximum was chosen because of the heavily detectable onset of the  $T_m$ . [b] Values could be obtained because the mixture remains liquid below its melting point (supercooled liquid). [c] The glass transition temperature is extracted from heating-up curves at 5 K·min<sup>-1</sup>.

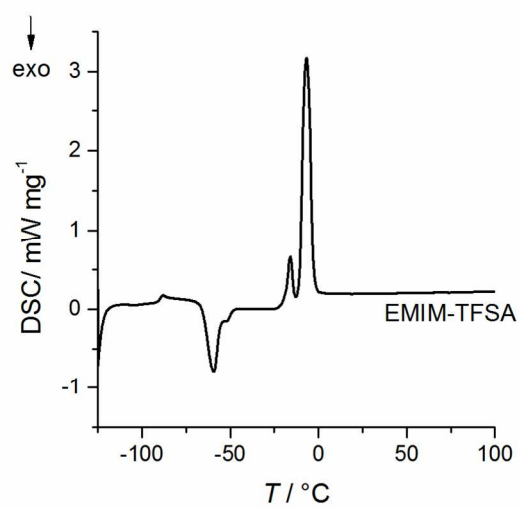

**Figure SI-1.** DSC measurement of EMIM-TFSA in closed Al crucible from -150 °C to 100 °C at 5 K min<sup>-1</sup> (exo down) without annealing before the measurement (cooling down at 10 K min<sup>-1</sup>; 5 min isothermal period at -150 °C).
